# Supplementary material
Source: HighWire-hosted journal article supplement (https://bmjopen.bmj.com/content/7/3/e012665)
Supplement: inline-supplementary-material-1 [file inline-supplementary-material-1.pdf]

Supplementary Table 1: Sensitivity analysis for incidence rates for venous thromboembolism (VTE), deep vein thrombosis (DVT), pulmonary embolism (PE) and other VTEs by carrier and confirmed non-carrier status

|                  | Carrier       |                                               | Confirmed non-carriers |                                               | Incidence rate ratio (95% CI) | P-value |
|------------------|---------------|-----------------------------------------------|------------------------|-----------------------------------------------|-------------------------------|---------|
|                  | No. of events | Incidence rate per 10,000 person-yrs (95% CI) | No. of events          | Incidence rate per 10,000 person-yrs (95% CI) |                               |         |
| VTE              | 55            | 14.88 (11.43, 19.39)                          | 6                      | 6.60 (2.97, 14.69)                            | 2.26 (0.97, 5.24)             | 0.052   |
| <i>DVT only</i>  | 24            | 6.53 (4.37, 9.74)                             | 4                      | 4.41 (1.66, 11.75)                            | 1.48 (0.51, 4.27)             | 0.2     |
| <i>PE only</i>   | 26            | 7.07 (4.81, 10.38)                            | 2                      | 2.20 (0.55, 8.81)                             | 3.21 (0.76, 13.51)            | 0.093   |
| <i>Other VTE</i> | 5             | 1.36 (0.57, 3.28)                             | 0                      | -                                             | -                             | -       |

Supplementary Table 2: Risk of VTE in carriers compared to non-carriers, adjusting for covariates

|                                     | Odds ratio for carrier status (95% CI) |
|-------------------------------------|----------------------------------------|
| Unadjusted (matched by age, gender) | 1.55 (1.09, 2.21)                      |
| Further adjusted for:               |                                        |
| Body mass index                     | 1.54 (1.07, 2.20)                      |
| Smoking status                      | 1.57 (1.10, 2.24)                      |
| Ethnicity                           | 1.70 (1.13, 2.54)                      |
| Pregnancy                           | 1.61 (1.12, 2.31)                      |
| Full model                          | 1.78 (1.17, 2.71)                      |
